# Supplementary material for: Unravelling the kinetics and molecular mechanism of the degenerate Cope rearrangement of bullvalene
Source: Royal Society of Chemistry journal article supplement (doi:10.1039/c9nj05965b), 2020-01-01
Supplement: c9nj05965b1.pdf [file c9nj05965b1.pdf]

## Supporting Information

### Unravelling the kinetics and molecular mechanism of the degenerate Cope rearrangement of bullvalene

Mahya Khojandi<sup>a</sup>, Ahmad Seif<sup>a,†</sup>, Ehsan Zahedi<sup>b</sup>, Luis R. Domingo<sup>c</sup>, Mehrnoosh Karimkhani<sup>a</sup>

<sup>a</sup> *Department of Chemistry, Central Tehran Branch, Islamic Azad University, Tehran, Iran*

<sup>b</sup> *Department of Chemistry, Shahrood Branch, Islamic Azad University, Shahrood, Iran*

<sup>c</sup> *Department of Organic Chemistry, University of Valencia, Dr. Moliner 50, 46100 Burjassot, Valencia, Spain*

---

† Corresponding author.

E-mail addresses: [ahmaseif@yahoo.com](mailto:ahmaseif@yahoo.com)

The optimized Cartesian coordinates at the QCISD-FC/6-311G(*d,p*) level of theory for bullvalene

|   |             |             |             |
|---|-------------|-------------|-------------|
| C | 1.08234900  | -1.17444300 | 0.84387100  |
| C | 1.55510900  | 0.00000100  | 0.00000100  |
| C | 1.08234900  | -0.14359200 | -1.43903200 |
| C | -0.21314800 | -0.17938700 | -1.79775600 |
| C | -0.21314800 | -1.46721100 | 1.05423100  |
| C | -1.37603400 | -0.71806400 | 0.51595000  |
| C | -1.37603600 | -0.08779400 | -0.87983600 |
| C | 1.08234800  | 1.31803500  | 0.59516200  |
| C | -0.21314900 | 1.64659700  | 0.74352400  |
| C | -1.37603500 | 0.80585700  | 0.36388700  |
| H | 1.84318900  | -1.80700000 | 1.29837600  |
| H | 2.65004000  | 0.00000200  | 0.00000200  |
| H | 1.84318800  | -0.22093200 | -2.21409600 |
| H | -0.45739400 | -0.28478600 | -2.85402300 |
| H | -0.45739400 | -2.32926800 | 1.67363900  |
| H | -2.33835100 | -1.12835600 | 0.81075900  |
| H | -2.33835100 | -0.13795800 | -1.38256500 |
| H | 1.84318700  | 2.02793100  | 0.91571400  |
| H | -0.45739600 | 2.61405100  | 1.18037700  |
| H | -2.33835100 | 1.26631300  | 0.57181000  |

The optimized Cartesian coordinates at the QCISD-FC/6-311G(*d,p*) level of theory for TS

|   |             |             |             |
|---|-------------|-------------|-------------|
| C | -1.24936100 | -0.57259300 | -1.03411400 |
| C | -1.51025800 | 0.48701600  | 0.00000100  |
| C | -1.24936100 | -0.57259700 | 1.03411200  |
| C | -0.00000100 | -0.98233700 | 1.50114200  |
| C | -0.00000100 | -0.98233200 | -1.50114600 |
| C | 1.24936100  | -0.57259400 | -1.03411500 |
| C | 1.24936000  | -0.57259800 | 1.03411400  |
| C | -0.66893100 | 1.73351500  | 0.00000300  |
| C | 0.66893400  | 1.73351400  | 0.00000300  |
| C | 1.51025800  | 0.48701300  | 0.00000100  |
| H | -2.12776400 | -1.08985900 | -1.41262800 |
| H | -2.56843300 | 0.75749900  | 0.00000100  |
| H | -2.12776500 | -1.08986400 | 1.41262400  |
| H | -0.00000200 | -1.81884700 | 2.19809000  |
| H | -0.00000100 | -1.81883900 | -2.19809700 |
| H | 2.12776300  | -1.08985900 | -1.41263200 |
| H | 2.12776300  | -1.08986500 | 1.41262800  |
| H | -1.20179500 | 2.68305300  | 0.00000200  |
| H | 1.20179900  | 2.68305100  | 0.00000300  |
| H | 2.56843400  | 0.75749500  | 0.00000200  |

**Table S1.** Unscaled harmonic vibrational frequencies and rotational moments of inertia calculated at the B3LYP/CBSB7 level of theory, as well as CBS energy

|                                           | <b>Bullvalene</b> |             |            | <b>TS</b>  |             |            |
|-------------------------------------------|-------------------|-------------|------------|------------|-------------|------------|
|                                           | 234.2841,         | 234.4208,   | 280.5155,  | 297.5355i, | 224.1048,   | 290.4814,  |
|                                           | 364.4574,         | 364.4716,   | 453.9800,  | 293.1036,  | 348.9779,   | 428.9370,  |
|                                           | 570.7333,         | 593.5521,   | 593.7839,  | 434.1306,  | 545.8573,   | 564.6110,  |
|                                           | 665.0627,         | 665.1537,   | 756.4140,  | 639.0318,  | 677.9963,   | 701.0394,  |
|                                           | 756.9061,         | 757.0600,   | 776.4508,  | 720.4314,  | 774.8002,   | 786.6388,  |
|                                           | 841.2011,         | 841.2263,   | 844.7914,  | 819.5765,  | 845.8067,   | 863.7566,  |
|                                           | 934.6927,         | 945.1354,   | 945.4591,  | 872.7022,  | 907.1339,   | 925.4358,  |
|                                           | 979.1389,         | 984.8866,   | 984.9009,  | 947.4361,  | 960.5860,   | 976.0763,  |
| Frequencies (cm <sup>-1</sup> )           | 1023.6079,        | 1023.8146,  | 1094.4228, | 988.9956,  | 1003.4933,  | 1111.3187, |
|                                           | 1094.5328,        | 1117.1780,  | 1201.7867, | 1165.3226, | 1201.4586,  | 1204.1521, |
|                                           | 1234.8586,        | 1234.9126,  | 1266.3703, | 1247.7419, | 1250.0796,  | 1259.5643, |
|                                           | 1342.8481,        | 1343.1009,  | 1377.9531, | 1277.3773, | 1383.9019,  | 1386.7437, |
|                                           | 1378.0023,        | 1393.6278,  | 1431.6822, | 1393.4750, | 1410.0422,  | 1437.6789, |
|                                           | 1431.6957,        | 1436.0109,  | 1690.3051, | 1472.0935, | 1506.3347,  | 1512.5274, |
|                                           | 1698.3059,        | 1698.3859,  | 3067.7316, | 1616.1702, | 1738.9581,  | 3087.0301, |
|                                           | 3129.2970,        | 3129.3115,  | 3132.1488, | 3088.3741, | 3134.7475,  | 3135.2368, |
|                                           | 3149.0630,        | 3149.1367,  | 3159.0540, | 3136.5497, | 3159.0421,  | 3169.6637, |
|                                           | 3159.6221,        | 3159.6631,  | 3169.6842  | 3173.0463, | 3174.9582,  | 3180.5989  |
| $I_a, I_b, I_c$ (amu. Bohr <sup>2</sup> ) | 948.60479,        | 1094.99364, | 1095.17999 | 956.51228, | 1070.72057, | 1124.83103 |
| CBS-QB3 (a.u.)                            |                   | -386.404452 |            |            | -386.384580 |            |

**Table S2.** Unscaled harmonic vibrational frequencies and rotational moments of inertia calculated at the HF/6-311G(*d,p*) level of theory, as well as CBS energy

|                                                                                                 | <b>Bullvalene</b> |             |            | <b>TS</b>  |             |            |
|-------------------------------------------------------------------------------------------------|-------------------|-------------|------------|------------|-------------|------------|
|                                                                                                 | 270.8005,         | 270.8346,   | 304.9118,  | 596.8281i, | 254.2387,   | 324.9415,  |
|                                                                                                 | 385.1118,         | 385.1372,   | 483.1542,  | 330.2670,  | 383.9308,   | 458.0983,  |
|                                                                                                 | 619.1719,         | 653.7832,   | 653.8275,  | 458.3750,  | 603.2906,   | 618.9764,  |
|                                                                                                 | 740.3491,         | 740.3580,   | 815.4654,  | 692.7445,  | 744.7131,   | 781.0401,  |
|                                                                                                 | 817.9511,         | 817.9722,   | 834.5925,  | 802.3102,  | 833.5844,   | 849.1489,  |
|                                                                                                 | 888.0859,         | 918.5269,   | 918.5286,  | 868.2677,  | 901.7981,   | 947.0919,  |
|                                                                                                 | 1008.3677,        | 1038.9481,  | 1038.9729, | 970.0893,  | 971.5200,   | 1002.9553, |
|                                                                                                 | 1102.4770,        | 1106.4760,  | 1106.4836, | 1027.1582, | 1059.2964,  | 1077.0396, |
| Frequencies (cm <sup>-1</sup> )                                                                 | 1122.0297,        | 1122.0461,  | 1169.3832, | 1089.1382, | 1108.7497,  | 1176.0676, |
|                                                                                                 | 1169.3986,        | 1239.9857,  | 1291.8207, | 1242.5977, | 1287.1382,  | 1299.1461, |
|                                                                                                 | 1325.8226,        | 1325.8314,  | 1355.7995, | 1338.3306, | 1338.7126,  | 1354.3347, |
|                                                                                                 | 1463.0921,        | 1463.1558,  | 1491.1026, | 1378.3602, | 1488.3042,  | 1502.1140, |
|                                                                                                 | 1491.1107,        | 1541.1615,  | 1550.3178, | 1506.9888, | 1541.9714,  | 1559.9434, |
|                                                                                                 | 1550.3224,        | 1558.2320,  | 1852.4996, | 1589.0230, | 1593.6451,  | 1643.4996, |
|                                                                                                 | 1855.8288,        | 1855.8460,  | 3216.2811, | 1753.9797, | 1893.1891,  | 3246.0843, |
|                                                                                                 | 3284.8382,        | 3284.8446,  | 3291.1433, | 3247.7236, | 3295.5877,  | 3296.6920, |
|                                                                                                 | 3299.1696,        | 3299.1826,  | 3312.8249, | 3299.5601, | 3321.9622,  | 3329.4809, |
|                                                                                                 | 3319.4524,        | 3319.4567,  | 3327.2077  | 3333.5952, | 3336.8533,  | 3343.2272  |
| <i>I</i> <sub>a</sub> , <i>I</i> <sub>b</sub> , <i>I</i> <sub>c</sub> (amu. Bohr <sup>2</sup> ) | 944.26542,        | 1085.97581, | 1086.04277 | 943.50303, | 1046.97407, | 1119.53744 |
| CBS-APNO (a.u.)                                                                                 |                   | -386.983497 |            |            | -386.963020 |            |
